# Supplementary material for: Antiproliferative activity of a series of copper(ii) complexes derived from a furan-containing N-acylhydrazone: monomers, dimers, charge status, and cell mechanistic studies on triple negative breast cancer cells
Source: Royal Society of Chemistry journal article supplement (doi:10.1039/d4dt03445g), 2025-01-01
Supplement: d4dt03445g1.pdf [file d4dt03445g1.pdf]

**Antiproliferative activity of a series of copper(II) complexes derived from a furan-containing *N*-acylhydrazone: monomers, dimers, charge status, and cell mechanistic studies on triple negative breast cancer cells**

Olivia Espíndola-Moreno<sup>1</sup>, Fagner da Silva Moura<sup>2</sup>, Lucía Santa Maria de la Parra<sup>1</sup>, Carolina Stellet<sup>2</sup>, Jilder D. P. Serna<sup>3</sup>, Renata Diniz<sup>4</sup>, Nicolás A. Rey<sup>2\*</sup>, Ignacio E. León<sup>1,5\*</sup>

<sup>1</sup> CEQUINOR (UNLP, CCT-CONICET La Plata, asociado a CIC), Departamento de Química, Facultad de Ciencias Exactas, Universidad Nacional de La Plata. Blvd. 120 N° 1465, La Plata (1900), Argentina.

<sup>2</sup> LABSO-Bio (CTC, PUC-Rio), Departamento de Química, Pontificia Universidade Católica do Rio de Janeiro. Rua Marquês de São Vicente, 225 - Gávea, Rio de Janeiro (22453-900), RJ, Brasil.

<sup>3</sup> Centro Brasileiro de Pesquisas Físicas. Rua Dr. Xavier Sigaud, 150 - Botafogo, Rio de Janeiro (22290-180), RJ, Brasil.

<sup>4</sup> Grupo de Cristalografia Química (ICEX, UFMG), Departamento de Química, Universidade Federal de Minas Gerais. Av. Presidente Antônio Carlos, 6627 - Pampulha, Belo Horizonte (31270-901), MG, Brasil.

<sup>5</sup> Cátedra de Fisiopatología, Departamento de Ciencias Biológicas, Facultad de Ciencias Exactas, Universidad Nacional de La Plata. 47 y 115, La Plata 1900, Argentina.

\* [ileon@biol.unlp.edu.ar](mailto:ileon@biol.unlp.edu.ar), [nicoarey@puc-rio.br](mailto:nicoarey@puc-rio.br) (joint corresponding authors).

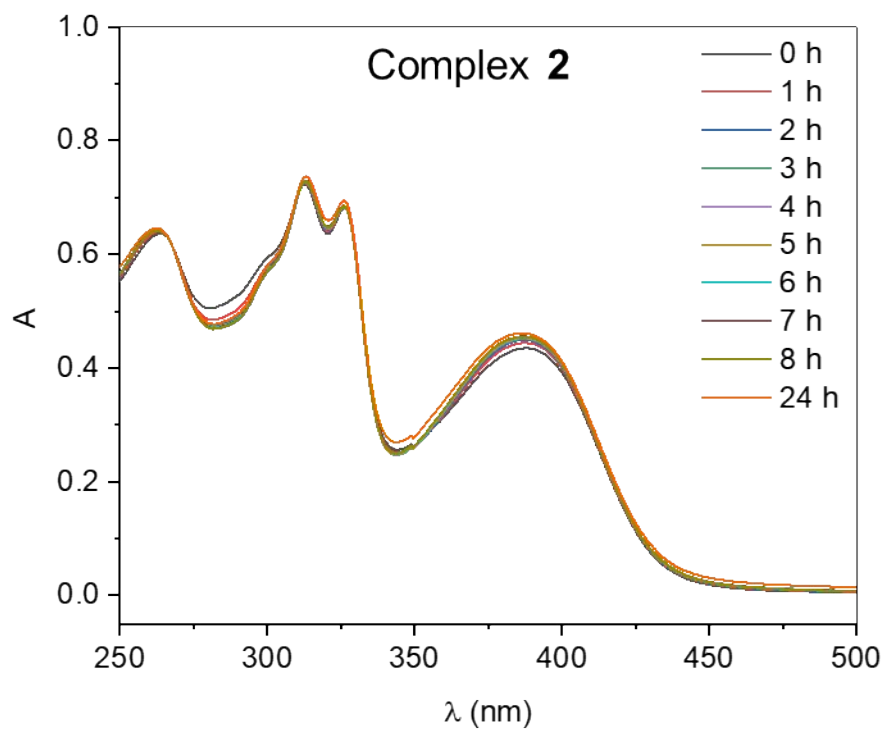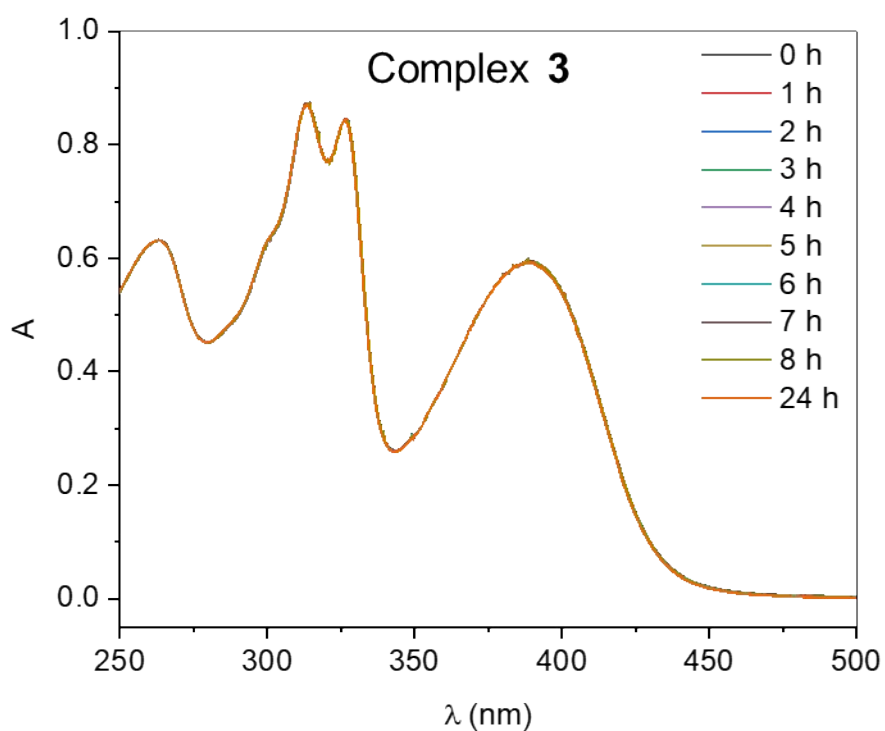

**Figure SM1.** UV-Vis stability evaluation for complexes **2** and **3** at  $2 \times 10^{-5}$  mol L<sup>-1</sup>, under conditions similar to those used in the cell studies (0.5% DMSO / PBS, pH 7.4), monitored over 24 h.

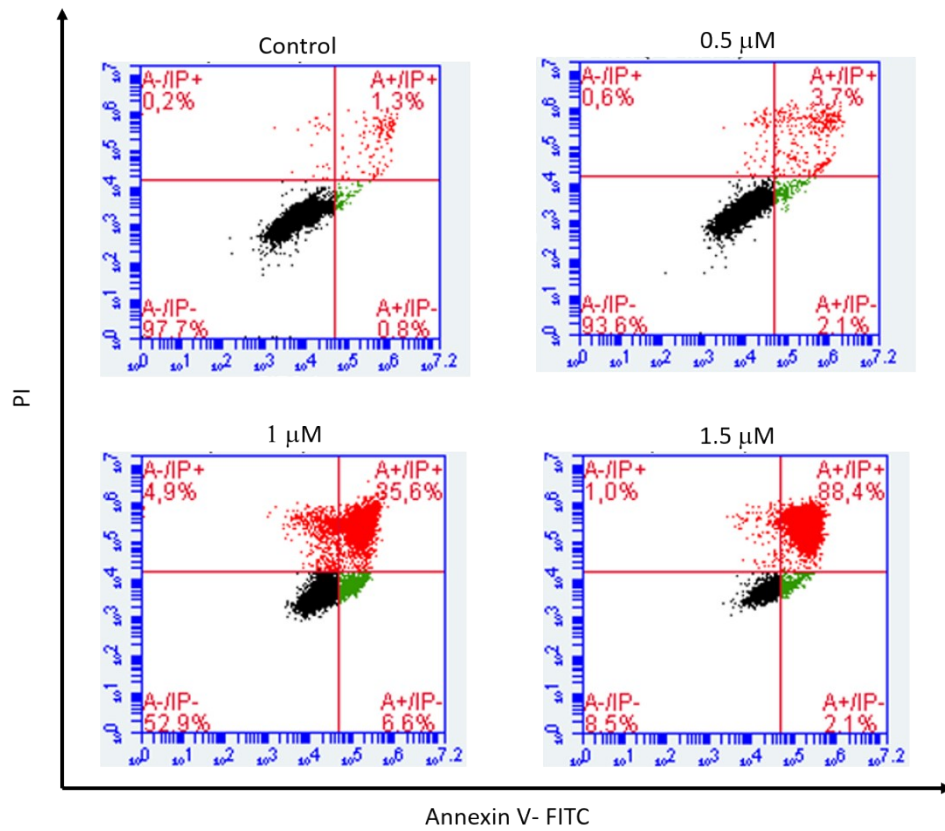

**Figure SM2.** Apoptosis dot plots on MDA-MB-231 cells treated with complex 2 (0.5, 1 and 1.5  $\mu$ M) obtained by flow cytometry.

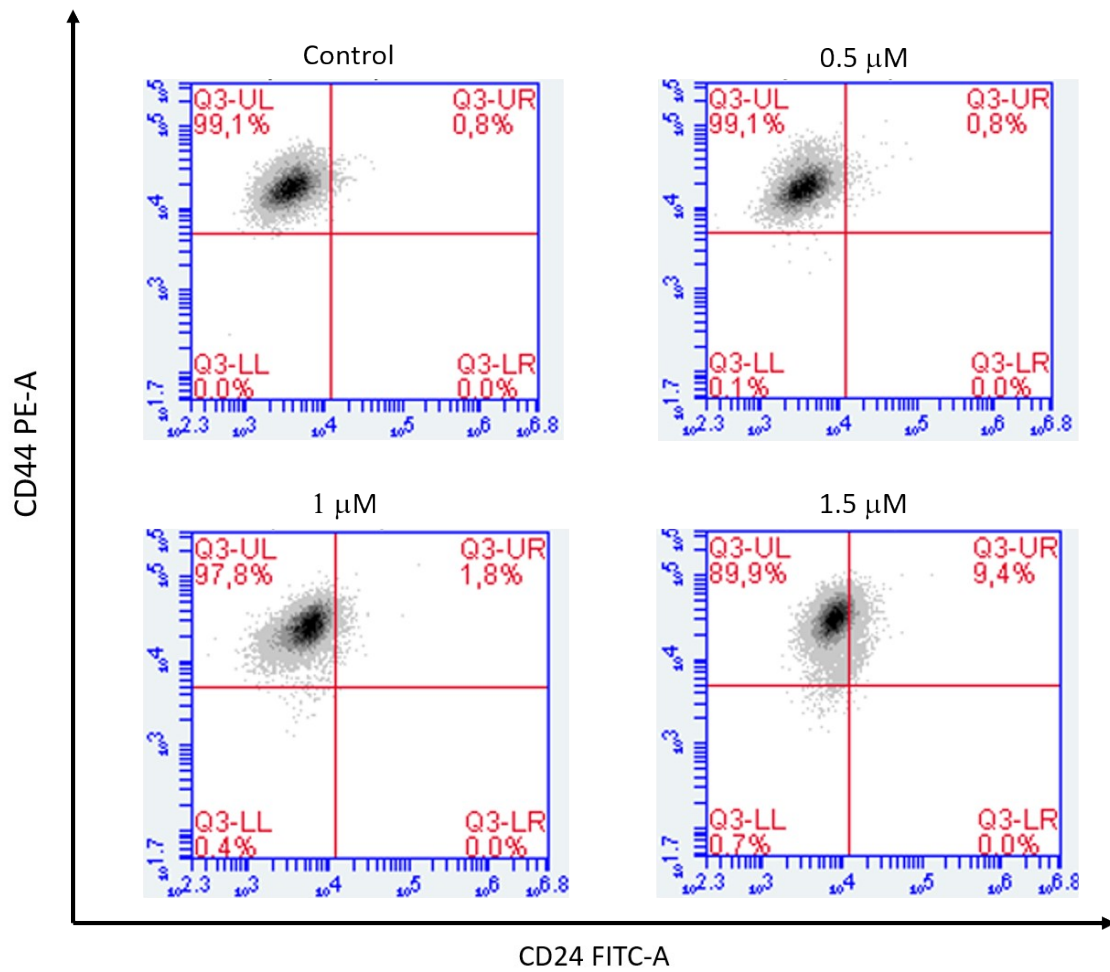

**Figure SM3.** CSC dot plots on MDA-MB-231 cells treated with complex 2 (0.5, 1 and 1.5  $\mu$ M) obtained by flow cytometry.
